# Supplementary material for: Enhancing the long-cycling performance of a LiNi0.8Co0.15Al0.05O2@LaNiO3 cathode material by surface modification
Source: Royal Society of Chemistry journal article supplement (doi:10.1039/d1se01880a), 2022-01-01
Supplement: d1se01880a1.pdf [file d1se01880a1.pdf]

## Supporting Information

### Enhancing the long-cycling performance of $\text{LiNi}_{0.8}\text{Co}_{0.15}\text{Al}_{0.05}\text{O}_2@ \text{LaNiO}_3$

#### cathode material by Surface Modification

Ju Fan<sup>[a,b]</sup>, Guorong Hu<sup>[a,b]</sup>, Haodong Su<sup>[a,b]</sup>, You Shi<sup>[a,b]</sup>, Ke Du<sup>[a,b]</sup>, Zhongdong Peng<sup>[a,b]</sup>, Qian Sun<sup>[a,b]</sup>, Yinjia Zhang<sup>[a,b]</sup>, Kaipeng Wu<sup>[c,d]</sup> and Yanbing Cao<sup>\*[a,b]</sup>

<sup>a</sup> School of Metallurgy and Environment, Central South University, Changsha, 410083, China

<sup>b</sup> Engineering Research Center of the Ministry of Education for Advanced Battery Materials, Central South University, Changsha, 410083, China

<sup>c</sup> College of Materials Science and Engineering, Sichuan University, Chengdu, 610064, China

<sup>d</sup> School of Materials Science and Engineering, Southwest University of Science and Technology, Mianyang 621010, China.

#### Experimental S1

The dissolved amount of transition metal is investigated by the following steps: immerse the uncirculated positive electrode in the electrolyte (vacuum oven) at 55°C, and take out 10ml of the electrolyte after 1-3 weeks to analyze the content.

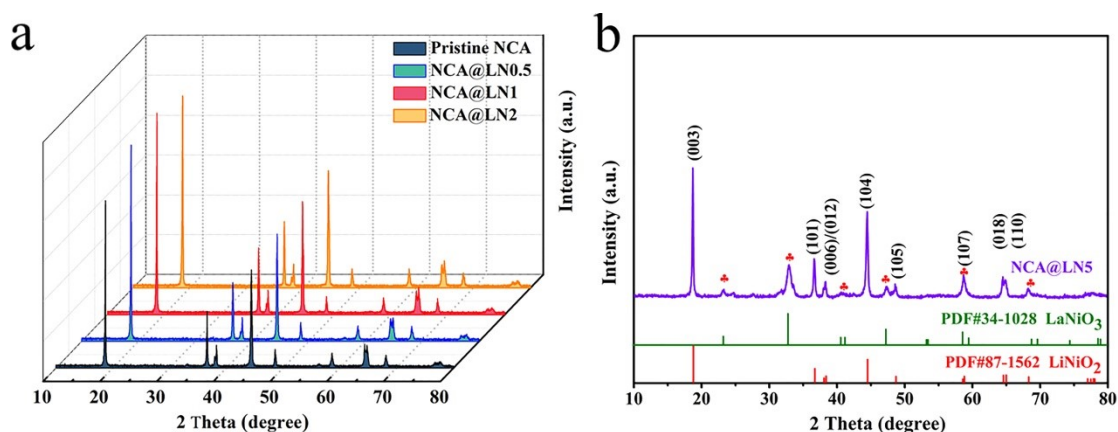

**Figure S1.** XRD patterns of (a) pristine NCA, NCA@LN0.5, NCA@LN1, and NCA@LN2, (b) NCA@LN5.

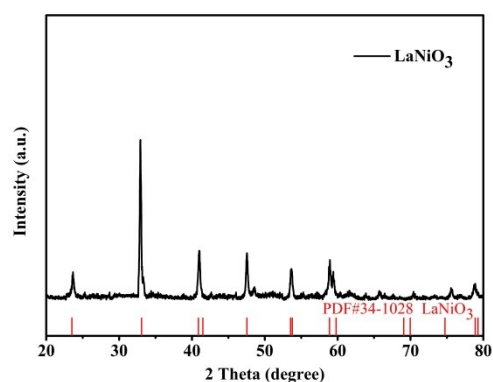

**Figure S2.** XRD patterns of  $\text{LaNiO}_3$ .

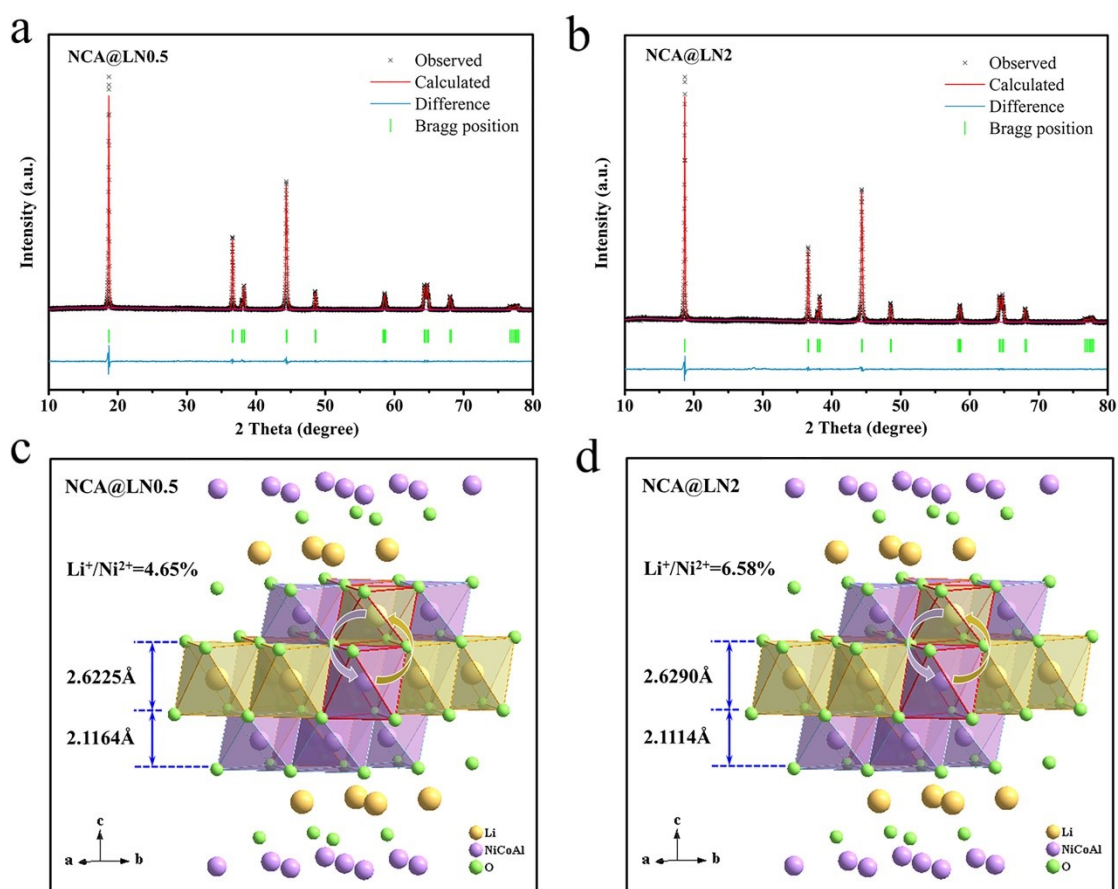

**Figure S3.** XRD patterns of (a)  $\text{NCA@LN0.5}$  and (b)  $\text{NCA@LN2}$  cathode materials; The crystal structures of (c)  $\text{NCA@LN0.5}$  and (d)  $\text{NCA@LN2}$  cathode materials by Rietveld refinement.

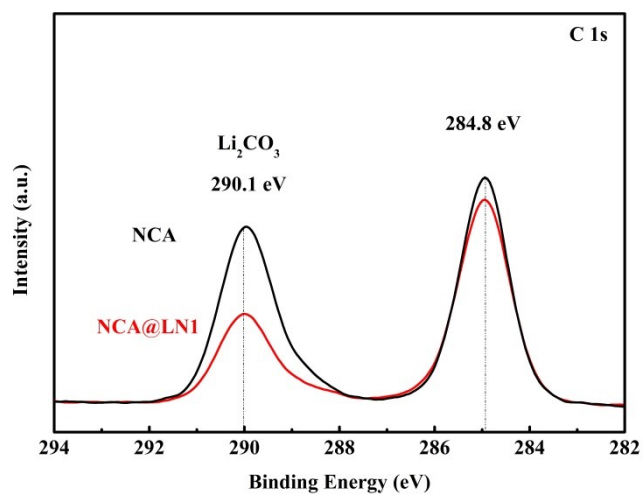

**Figure S4.** C 1s spectra of pristine NCA and NCA@LN1.

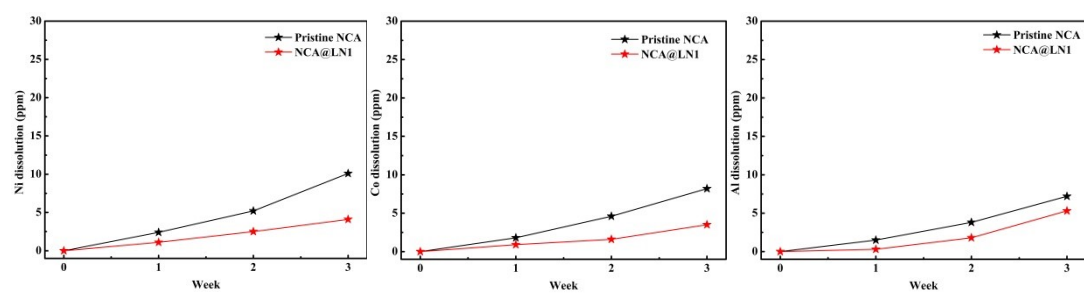

**Figure S5.** Dissolved amounts of metals of Ni, Co, and Al under different storage times at 55 °C.
